# Supplementary material
Source: PubMed Central journal article supplement (PMC8591721)
Supplement: ml1c00373_si_001.pdf [file ml1c00373_si_001.pdf]

## **BMS-813160: A Potent CCR2 and CCR5 Dual Antagonist Selected as a Clinical Candidate**

*Robert J. Cherney,\*<sup>†</sup> Prakash Anjanappa,<sup>‡</sup> Kumaravel Selvakumar,<sup>‡</sup> Douglas G. Batt,<sup>†</sup> Gregory D. Brown,<sup>†</sup> Anne V. Rose,<sup>†</sup> Ragini Vuppugalla,<sup>†</sup> Jing Chen,<sup>†</sup> Jian Pang,<sup>†</sup> Songmei Xu,<sup>†</sup> Melissa Yarde,<sup>†</sup> Andrew J. Tebben,<sup>†</sup> Venkatram Reddy Paidi,<sup>‡</sup> Mary Ellen Cvijic,<sup>†</sup> Arvind Mathur,<sup>†</sup> Joel C. Barrish,<sup>†</sup> Sandhya Mandlekar,<sup>†</sup> Qihong Zhao,<sup>†</sup> and Percy H. Carter<sup>†</sup>*

<sup>†</sup>Bristol Myers Squibb Company, Research and Early Development, Princeton, New Jersey 08540-4000, United States

<sup>‡</sup>Biocon Bristol Myers Squibb Research and Development Center, Bangalore 560099, India

## **Supporting Information**

### **Table of Content**

|                                                                            |       |
|----------------------------------------------------------------------------|-------|
| General                                                                    | S1    |
| HPLC conditions                                                            | S2    |
| Procedures and characterization data for compounds <b>3</b> and <b>5-7</b> | S2-S4 |
| TG peritonitis mouse model                                                 | S4    |
| Human CXCR2 binding assay                                                  | S4-S5 |
| Human liver microsome t <sub>1/2</sub> assay                               | S5    |
| References                                                                 | S5    |

### **Experimental Procedures:**

All experiments involving animals were performed in accordance with institutional guidelines as defined by the Institutional Animal Care and Use Committee for U.S. institutions. Assays in Table 1 were performed as previously described.<sup>1</sup> Assays in Table 2 were performed in an analogous manner to the following literature procedures: CCR1 binding assay,<sup>2</sup> CCR4 binding assay,<sup>3</sup> CXCR2 binding assay (see description below), human liver microsome (see description below), hERG patch clamp,<sup>4</sup> protein binding (human, mouse, and rat),<sup>5</sup> and PAMPA.<sup>1</sup> The mouse CCR2 binding assay (mouse CCR2 Bnd, Table 2) was run analogously to the human CCR2 binding assay except mouse [<sup>125</sup>I]-CCL2 was used instead of human [<sup>125</sup>I]-CCL2.

Anhydrous solvents from commercial sources were used for all reactions. All other reagents and solvents were reagent grade and used as received from commercial sources. Column chromatography was performed on a Teledyne ISCO system with commercial silica gel columns. Final compounds were purified by reversed phase high-performance liquid chromatography (HPLC) as indicated. <sup>1</sup>H NMR were obtained on Bruker or JEOL spectrometers (operating at 400 MHz or 600 MHz), and the signals are reported in ppm relative to TMS (NMR abbreviations: s = singlet, br s = broad singlet, d = doublet, dd = doublet of doublets, t = triplet, q = quartet, quin = quintuplet, sep = septet, m = multiplet). All mass spectra were recorded using electrospray ionization (ESMS) in the positive (pos) mode unless otherwise noted. All assayed compounds have a purity of >90% as assessed by analytical HPLC.

## HPLC Conditions:

### Method A: (analytical)

Column: YMC ODS C<sub>18</sub> (4.6 x 50 mm, 3 μm); mobile phase A: 10:90 MeOH:water with 0.2% H<sub>3</sub>PO<sub>4</sub>; mobile phase B: 90:10 MeOH:water with 0.2% H<sub>3</sub>PO<sub>4</sub>; flow rate 2.5 mL/min; gradient 0% B to 100% B over 8 min; wavelength 220 nm.

### Method B: (preparative)

Column: Phenomenex Luna C<sub>18</sub> (21.2 x 100 mm, 5 μm); mobile phase A: 10:90 MeOH:water with 0.1% TFA; mobile phase B: 90:10 MeOH:water with 0.1% TFA; flow rate 20 mL/min; gradient 0% B to 100% B over 12 min; wavelength 220 nm.

## N-((1R,2S,5R)-2-((S)-3-((7-(tert-butyl)pyrazolo[1,5-a][1,3,5]triazin-4-yl)amino)-2-oxopyrrolidin-1-yl)-5-(tert-butylamino)cyclohexyl)acetamide (Compound 3)

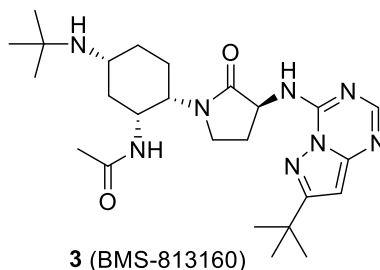

### Step 1: 1-(ethoxycarbonyl)-3-(3-(tert-butyl)-1H-pyrazol-5-yl)-thiourea 5

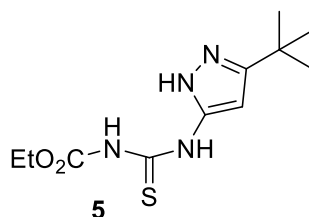

To a solution of 3-amino-5-*tert*-butyl pyrazole **4** (1.00 g, 7.18 mmol) in ethyl acetate (10 mL) and benzene (50 mL) at 5 °C was added a solution of ethoxycarbonyl isothiocyanate (0.942 g, 7.18 mmol) in benzene (10 mL) dropwise.<sup>6</sup> After the addition, the reaction was warmed to rt and was stirred for 16 h. This mixture was concentrated. The resulting residue was purified by silica gel chromatography using 0-40% ethyl acetate/petroleum ether to give 1-(ethoxycarbonyl)-3-(3-(*tert*-butyl)-1*H*-pyrazol-5-yl)-thiourea **5** (1.75 g, 90%) as an off-white solid: <sup>1</sup>H NMR (400 MHz, DMSO-*d*<sub>6</sub>) δ 12.43 (s, 1H), 11.97 (s, 1H), 11.24 (s, 1H), 6.83 (d, J=2.0 Hz, 1H), 4.22 (q, J=7.0 Hz, 2H), 1.30 - 1.24 (m, 13H); LCMS calculated for C<sub>11</sub>H<sub>18</sub>N<sub>4</sub>O<sub>2</sub>S [M+H]<sup>+</sup>: m/z = 271.1, found: 271.1.

### Step 2: 7-(tert-butyl)-2-thioxo-2,3-dihydropyrazolo[1,5-a][1,3,5]triazin-4(1H)-one 6

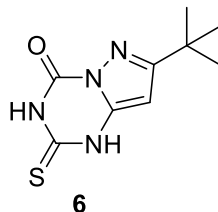

Compound **5** (1.40 g, 5.18 mmol) was dissolved in 2 N NaOH (25 mL, 50 mmol) and stirred at rt for 2 h. The solution was cooled and acidified to pH = 1 by the addition of 2 N H<sub>2</sub>SO<sub>4</sub>. The solid product was collected by filtration and dried to give 7-(*tert*-butyl)-2-thioxo-2,3-dihydropyrazolo[1,5-*a*][1,3,5]triazin-4(1*H*)-one **6** (1.1 g, 95%): <sup>1</sup>H NMR (400 MHz, DMSO-*d*<sub>6</sub>) δ 13.38 (br s, 1H), 12.75 (br.s, 1H), 5.84 (s, 1H), 1.34 (s, 9H); LCMS calculated for C<sub>9</sub>H<sub>12</sub>N<sub>4</sub>OS [M+H]<sup>+</sup>: m/z = 225.1, found: 225.2.

**Step 3:** 7-(*tert*-butyl)pyrazolo[1,5-*a*][1,3,5]triazin-4(3*H*)-one **7**

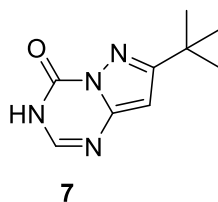

To compound **6** (536 mg, 2.39 mmol) in methanol (15 mL) was added concentrated (29%) ammonium hydroxide solution (10 mL) and Raney nickel (500 mg). The reaction mixture was heated at 100 °C for 4 h. After cooling, the mixture was filtered and the filtrate was concentrated. The resulting residue was purified by silica gel chromatography (0-5% MeOH/DCM) to give 7-(*tert*-butyl)pyrazolo[1,5-*a*][1,3,5]triazin-4(3*H*)-one **7** (230 mg, 50%) as an off-white solid: <sup>1</sup>H NMR (400 MHz, DMSO-*d*<sub>6</sub>) δ 12.44 (br s, 1H), 7.96 (s, 1H), 6.50 (s, 1H), 1.32 - 1.25 (m, 9H); LCMS calculated for C<sub>9</sub>H<sub>12</sub>N<sub>4</sub>O [M+H]<sup>+</sup>: m/z = 193.1, found: 193.1.

**Step 4 (final step):** *N*-((1*R*,2*S*,5*R*)-2-((*S*)-3-((7-(*tert*-butyl)pyrazolo[1,5-*a*][1,3,5]triazin-4-yl)amino)-2-oxopyrrolidin-1-yl)-5-(*tert*-butylamino)cyclohexyl)acetamide (Compound **3**)

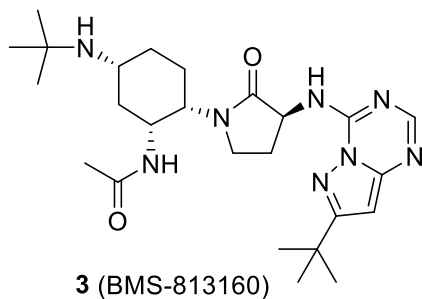

7-(*tert*-butyl)pyrazolo[1,5-*a*][1,3,5]triazin-4-ol **7** (300 mg, 1.6 mmol) was dissolved in POCl<sub>3</sub> (7.3 mL, 78 mmol) and heated to reflux overnight. After cooling, the POCl<sub>3</sub> was removed by rotary

evaporation. This was dissolved in DCM and concentrated (X3). The resulting residue was taken up in DCM and washed with saturated NaHCO<sub>3</sub> solution (aq). The organic layer was dried (MgSO<sub>4</sub>), filtered, and concentrated to give crude 7-*tert*-butyl-4-chloropyrazolo[1,5-*a*][1,3,5]triazine **8** (338 mg, 1.6 mmol): LCMS = 211.1 [M+H]<sup>+</sup>, a portion of which was used in the following. *N*-((1*R*,2*S*,5*R*)-2-((*S*)-3-amino-2-oxopyrrolidin-1-yl)-5-(*tert*-butylamino)cyclohexyl)-acetamide **9**<sup>7</sup> (230 mg, 0.74 mmol) was dissolved in 2-propanol (3 mL) and triethylamine (0.26 mL, 1.85 mmol). This solution was added to crude 7-*tert*-butyl-4-chloropyrazolo[1,5-*a*][1,3,5]triazine **8** (130 mg, 0.62 mmol) from above. After 3 h, the solution was concentrated. This crude material was partitioned between water containing AcOH (0.085 mL, 1.48 mmol) and Et<sub>2</sub>O. The aqueous layer (containing product) was lyophilized overnight. The resulting residue was purified by preparative reverse phase HPLC (Method B, product retention time = 8.8 min). The fractions containing product were concentrated. This residue was dissolved in DCM and a saturated Na<sub>2</sub>CO<sub>3</sub> solution (aq) was added. The organic layer was dried (Na<sub>2</sub>SO<sub>4</sub>), filtered, and concentrated to give free base title compound *N*-((1*R*,2*S*,5*R*)-5-(*tert*-butylamino)-2-((*S*)-3-(7-*tert*-butylpyrazolo[1,5-*a*][1,3,5]triazin-4-ylamino)-2-oxopyrrolidin-1-yl)cyclohexyl)acetamide **3** (45.6 mg, 0.094 mmol, 15%): LCMS *m/z* = 485.4 [M+H]<sup>+</sup>; <sup>1</sup>H NMR (600 MHz, DMSO-*d*<sub>6</sub>) δ 1.04 (s, 9H), 1.34 (s, 9H), 1.58 (m, 3H), 1.64 (m, 2H), 1.81 (s, 3H), 2.05 (m, 1H), 2.12 (m, 1H), 2.36 (m, 1H), 2.93 (br s, 1H), 3.48 (m, 2H), 3.84 (m, 1H), 4.26 (br s, 1H), 4.86 (t, *J* = 8.9 Hz, 1H), 6.39 (s, 1H), 8.07 (s, 1H), 8.94 (br s, 1H); <sup>13</sup>C NMR (125.8 MHz, DMSO-*d*<sub>6</sub>) δ 21.3, 23.3, 25.9, 29.3, 30.0, 32.2, 32.6, 35.5, 43.1, 46.5, 47.7, 50.7, 51.7, 52.5, 92.3, 148.7, 148.8, 152.9, 167.3, 168.5, 171.2; HRMS calcd for C<sub>25</sub>H<sub>40</sub>N<sub>8</sub>O<sub>2</sub> [M+H]<sup>+</sup> 485.3347, found 485.3346; Analytical HPLC *t*<sub>R</sub> = 4.4 min (Method A).

**Thioglycollate (TG)-induced peritonitis mouse model<sup>8</sup> (Figure 3).** Six to eight C57BL/6 male mice (Taconic Laboratories), age 9-11 weeks, were treated with compound (vehicle was 0.02 N HCl) by gavage one hour prior to thioglycollate challenge. Thioglycollate (Hardy Diagnostics) was administered IP, 1 mL per mouse. For the 48 hour model, mice were dosed by gavage, BID, for 2 days. On day 3, serum was collected for compound exposure, and the mice were sacrificed by carbon dioxide overdose. The peritoneal cavity was injected with 5 mL phosphate-buffered saline containing 0.01M EDTA and 10% fetal bovine serum. The peritoneal cavity was massaged 15 times, and then the contents collected to retrieve the inflammatory cells. The typical retrieval volume was 4.2-4.5 mL. Total cell counts were determined on a CASY counter, and cytopspin slides were made of the lavaged cells. The slides were stained with Diff-Quik, and differential cell counts were performed by manually counting 200 cells per slide. The total cell number of each inflammatory cell type was calculated for each mouse. The average and standard error of the mean (SEM) for recruited monocytes and macrophages for each group was plotted.

**Human CXCR2 binding assay (CXCR2 Bnd, Table 2).** The human CXCR2 ligand binding assay was established with human overexpressed pEAK cells (Perkin Elmer Membrane Preparation Cat.# RPHCX2M) using human [<sup>125</sup>I]-Interleukin-8 as the tracer ligand (Perkin Elmer, NEX277). 10 μg of membrane per well was incubated with [<sup>125</sup>I]-Interleukin-8 (2000 Ci/mmol, 0.162 nM) and 200 nM unlabeled ligand in a total volume of 0.1 mL for 90 min at 25 °C. The mixture was filtered over GF/C (S&S) filters (presoaked in 0.5% PEI) and the filters were washed 5x with 1 mL ice-cold 50 mM HEPES-KOH (pH 7.4), 0.5 M NaCl and 0.1% BSA. After washing, the plate was air-dried for 60 minutes at room temperature. This was followed by adding 25 μL of Microscint 20 into each well. The plate was sealed and counted on the

Trilux for 1 min. All conditions were tested in duplicate. The IC<sub>50</sub> is defined as the concentration of competing cold ligand required to reduce specific binding by 50%.

**Method for liver microsome t<sub>1/2</sub> assay (LM t<sub>1/2</sub>, Table 2).** Using compound **3** as an example, compound **3** (0.5 μM) was incubated with liver microsomes (1 mg/mL final concentration) fortified with NADPH (1 mM) at 37 °C. Metabolic reactions were terminated after 0, 5, 10, 15, 30, and 45 minutes by transferring an aliquot of the reaction mixtures into an acetonitrile quench solution to denature microsomal enzymes. The relative amount of the compound **3** remaining in the reaction mixtures at each time point was quantified using LC-MS/MS analysis. The results for each time point were normalized to the relative amount of compound **3** in the 0-minute sample and expressed as percent remaining. The elimination rate constant (k<sub>el</sub>) was determined using a linear regression model (natural logarithm of % remaining versus time), and metabolic half-life was calculated (0.693 /k<sub>el</sub>).

### References:

- (1) Carter, P. H.; Cherney, R. J. *N-((1R,2S,5R)-5-(tert-butylamino)-2-((S)-3-(7-tert-butylpyrazolo[1,5-a] [1,3,5] triazin-4-ylamino)- 2-oxopyrrolidin-1-yl)cyclohexyl) acetamide*, a dual modulator of chemokine receptor activity, crystalline forms and processes. Patent no. US 8,618,101 B2, December 31, 2013.
- (2) Cavallaro, C. L.; Briceno, S.; Chen, J.; Cvijic, M. E.; Davies, P.; Hynes, J., Jr.; Liu, R. Q.; Mandlekar, S.; Rose, A. V.; Tebben, A. J.; Van Kirk, K.; Watson, A.; Wu, H.; Yang, G.; Carter, P. H. Discovery and lead optimization of a novel series of CC chemokine receptor 1 (CCR1)-selective piperidine antagonists via parallel synthesis. *J. Med. Chem.* **2012**, *55*, 9643-9653.
- (3) Viney, J. M.; Andrew, D. P.; Phillips, R. M.; Meiser, A.; Patel, P.; Lennartz-Walker, M.; Cousins, D. J.; Barton, N. P.; Hall, D. A.; Pease, J. E. Distinct conformations of the chemokine receptor CCR4 with implications for its targeting in allergy. *J. Immunol.* **2014**, *192*, 3419-3427.
- (4) Zhou, Z.; Gong, Q.; Ye, B.; Fan, Z.; Makielski, J. C.; Robertson, G. A.; January, C. T. Properties of hERG channels stably expressed in HEK 293 cells studied at physiological temperature. *Biophys. J.* **1998**, *74*, 230-241.
- (5) Waters, N. J.; Jones, R.; Williams, G.; Sohal, B. Validation of a rapid equilibrium dialysis approach for the measurement of plasma protein binding. *J. Pharm. Sci.* **2008**, *97*, 4586-4595.
- (6) Kobe, J.; Robins, R. K.; O'Brien, D. E. The synthesis and chemical reactions of certain pyrazolo[1,5-a]-1,3,5-triazines. *J. Heterocycl. Chem.* **1974**, *11*, 199-204.
- (7) Yang, M. G.; Xiao, Z.; Zhao, R.; Tebben, A. J.; Wang, B.; Cherney, R. J.; Batt, D. G.; Brown, G. D.; Cvijic, M. E.; Duncia, J. V.; Galella, M.; Gardner, D. S.; Khandelwal, P.; Malley, M. F.; Pang, J.; Rose, A. V.; Santella, J. B., 3rd; Sarjeant, A. A.; Xu, S.; Mathur, A.; Mandlekar, S.; Vuppugalla, R.; Zhao, Q.; Carter, P. H. Discovery of BMS-753426: A potent orally bioavailable antagonist of CC chemokine receptor 2. *ACS Med. Chem. Lett.* **2021**, *12*, 969-975.
- (8) Melnicoff, M. J.; Horan, P. K.; Morahan, P. S. Kinetics of changes in peritoneal cell populations following acute inflammation. *Cell. Immunol.* **1989**, *118*, 178-191.
